# Supplementary material for: Historical Changes in Weight Classes and the Influence of NAFLD Prevalence: A Population Analysis of 34,486 Individuals
Source: MDPI journal article supplement (doi:10.3390/ijerph19169935), 2022-08-11
Supplement: s1 [file s1]

**Supplementary Table S1. Clinical Characteristics of Lean, Overweight and Obese Population 10 Years Prior**

|                           | Lean                           | Overweight                     | Obese                          | P-value |
|---------------------------|--------------------------------|--------------------------------|--------------------------------|---------|
| Sample Size               | 12,239                         | 12,800                         | 9,447                          |         |
| Age (years)               | 52.00 (IQR: 43.00 to 64.00)    | 59.00 (IQR: 47.00 to 69.00)    | 60.00 (IQR: 48.00 to 69.00)    | < 0.01* |
| Gender (male)             | 40.17 (95%CI: 39.31 to 41.05)  | 57.58 (95%CI: 56.72 to 58.43)  | 49.57 (95%CI: 48.56 to 50.58)  | < 0.01* |
| Platelet (1000 cells/uL)  | 248.00 (IQR: 209.00 to 292.00) | 239.00 (IQR: 202.00 to 284.00) | 239.00 (IQR: 200.00 to 285.00) | < 0.01* |
| Glycohemoglobin (%)       | 5.50 (IQR: 5.20 to 5.70)       | 5.60 (IQR: 5.30 to 6.00)       | 5.80 (IQR: 5.50 to 6.50)       | < 0.01* |
| Fasting Glucose (mmol/L)  | 5.44 (IQR: 5.05 to 5.88)       | 5.77 (IQR: 5.33 to 6.42)       | 6.00 (IQR: 5.44 to 7.16)       | < 0.01* |
| Total Bilirubin (umol/L)  | 10.26 (IQR: 8.55 to 13.68)     | 10.26 (IQR: 8.55 to 13.68)     | 10.26 (IQR: 8.55 to 13.68)     | < 0.01* |
| AST (IU/L)                | 23.00 (IQR: 19.00 to 27.00)    | 23.00 (IQR: 20.00 to 28.00)    | 22.00 (IQR: 19.00 to 27.00)    | < 0.01* |
| ALT (IU/L)                | 20.00 (IQR: 16.00 to 26.00)    | 22.00 (IQR: 17.00 to 29.00)    | 21.00 (IQR: 16.00 to 29.00)    | < 0.01* |
| GGT (IU/L)                | 19.00 (IQR: 14.00 to 30.00)    | 23.00 (IQR: 16.00 to 34.00)    | 23.00 (IQR: 17.00 to 35.00)    | < 0.01* |
| LDL (mg/dL)               | 117.00 (IQR: 95.00 to 142.00)  | 118.00 (IQR: 95.00 to 142.00)  | 111.00 (IQR: 87.00 to 136.00)  | < 0.01* |
| HDL (mg/dL)               | 56.00 (IQR: 46.00 to 69.00)    | 49.00 (IQR: 41.00 to 60.00)    | 48.00 (IQR: 40.00 to 58.00)    | < 0.01* |
| Total Cholesterol (mg/dL) | 201.00 (IQR: 176.00 to 228.00) | 199.00 (IQR: 173.00 to 227.00) | 190.00 (IQR: 163.00 to 219.00) | < 0.01* |
| Triglycerides (mg/dL)     | 110.00 (IQR: 76.00 to 167.00)  | 135.00 (IQR: 92.00 to 204.00)  | 138.00 (IQR: 95.00 to 205.00)  | < 0.01* |
| Waist Circumference (cm)  | 89.40 (IQR: 81.90 to 97.00)    | 100.80 (IQR: 94.00 to 108.00)  | 112.30 (IQR: 103.50 to 122.40) | < 0.01* |
| Body Mass Index (kg/m2)   | 24.40 (IQR: 22.10 to 27.02)    | 28.67 (IQR: 26.30 to 31.40)    | 34.06 (IQR: 30.50 to 38.70)    | < 0.01* |
| Weight (kg)               | 67.70 (IQR: 59.20 to 77.50)    | 81.10 (IQR: 71.50 to 91.20)    | 95.40 (IQR: 82.10 to 110.30)   | < 0.01* |
| Diabetes                  | 8.95 (95%CI: 8.44 to 9.48)     | 20.88 (95%CI: 20.16 to 21.62)  | 38.97 (95%CI: 37.96 to 39.99)  | < 0.01* |

|                         |                               |                               |                               |                   |
|-------------------------|-------------------------------|-------------------------------|-------------------------------|-------------------|
| Hypertension            | 49.66 (95%CI: 48.72 to 50.60) | 66.47 (95%CI: 65.61 to 67.31) | 76.40 (95%CI: 75.51 to 77.28) | <b>&lt; 0.01*</b> |
| Ethnicity               |                               |                               |                               | <b>&lt; 0.01*</b> |
| Mexican American        | 12.99 (95%CI: 12.41 to 13.60) | 17.88 (95%CI: 17.23 to 18.56) | 17.60 (95%CI: 16.85 to 18.38) |                   |
| Hispanic                | 8.12 (95%CI: 7.65 to 8.62)    | 8.93 (95%CI: 8.45 to 9.44)    | 7.49 (95%CI: 6.98 to 8.04)    |                   |
| Caucasian               | 48.01 (95%CI: 47.13 to 48.90) | 44.23 (95%CI: 43.38 to 45.10) | 43.57 (95%CI: 42.57 to 44.57) |                   |
| African American        | 19.84 (95%CI: 19.14 to 20.55) | 19.83 (95%CI: 19.15 to 20.53) | 24.92 (95%CI: 24.06 to 25.80) |                   |
| Other Race              | 11.04 (95%CI: 10.50 to 11.61) | 9.12 (95%CI: 8.64 to 9.64)    | 6.41 (95%CI: 5.94 to 6.93)    |                   |
| Annual Household Income |                               |                               |                               | <b>&lt; 0.01*</b> |
| <US\$10,000             | 7.65 (95%CI: 7.14 to 8.19)    | 6.71 (95%CI: 6.25 to 7.20)    | 7.64 (95%CI: 7.08 to 8.24)    |                   |
| US\$10,000 – 24,999     | 25.35 (95%CI: 24.50 to 26.21) | 25.24 (95%CI: 24.42 to 26.07) | 27.17 (95%CI: 26.21 to 28.15) |                   |
| US\$25,000 – 44,999     | 23.74 (95%CI: 22.92 to 24.59) | 24.98 (95%CI: 24.17 to 25.82) | 25.53 (95%CI: 24.59 to 26.49) |                   |
| US\$45,000 – 74,999     | 22.14 (95%CI: 21.34 to 22.97) | 22.22 (95%CI: 21.44 to 23.02) | 20.74 (95%CI: 19.87 to 21.64) |                   |
| ≥US\$75,000             | 21.12 (95%CI: 20.33 to 21.93) | 20.85 (95%CI: 20.09 to 21.63) | 18.92 (95%CI: 18.08 to 19.78) |                   |

**Legend:** IQR, Interquartile Range; 95%CI, 95% Confidence Interval; AST, Aspartate Aminotransferase; ALT, Alanine Aminotransferase; GGT, Gamma-Glutamyl Transferase; LDL, Low Density Lipoprotein; HDL, High Density Lipoprotein \* bolded p-value ≤0.05 denotes statistical significance
